# Supplementary material
Source: PubMed Central journal article supplement (PMC5098650)
Supplement: pnas.1613623113.sapp.pdf [file pnas.1613623113.sapp.pdf]

## **Supplementary Materials and Methods**

### **Plant growth and nucleic acid extraction**

Hybrids were made between *Arabidopsis thaliana* C24 and Landsberg *erecta* or Columbia by hand pollination. Parental lines, hybrids and selfed F2 seeds were sterilized and stratified for 2 days at 4°C and sown onto MS medium. At 18 days plants were transferred to soil (Debco seed raising mix supplemented with 1g/L Osmocote pellets) and grown in 16hr day cycle at 22°C/18°C (day/night). For McrBC qRT-PCR and bisulphite PCR immature inflorescence was collected in pools of plants for parents and F1 hybrids while F2 plants were individually collected. For deep sequencing immature inflorescence was collected as a pool for parental lines while immature inflorescence was collected from individuals for the F1 and F2 generations. For the analysis of developmental timing, McrBC qRT-PCR was carried out on 3Day after sowing (DAS) whole seedlings, 7 DAS aerial tissue, 15 DAS leaves, 21 DAS leaves, 28 DAS four largest leaves, and immature inflorescence. Material was frozen in liquid nitrogen and stored at -80°C for processing.

### **McrBC qRT-PCR**

Frozen immature inflorescence were ground in a mortar and pestle. DNA was extracted using the Plant DNeasy Minikit (Qiagen) following manufactures instructions. 50ng of genomic DNA was used for a negative control and a positive control. The positive control was digested with 1U McrBC enzyme, with both the negative control and positive control incubated at 37°C for 16 hours followed by heat inactivation at 65°C for 15 minutes. 10µl of a 1/20 dilution of the DNA was then used in a real-time reaction using the Corbett RG-6000 machine. All reactions were normalized to the *ACTIN* gene and then to the undigested control. PCR conditions were: step 1: 94°C-10 min; step 2: 95°C-20 sec, 58°C-20 sec, 72°C-20 sec (45 cycles). In figures containing McrBC graphs, digestion levels have been inverted to represent <sup>m</sup>C levels. Primer sequences are provided in Table S3.

### **Genotyping of At1g11450**

At1g11450 was amplified using primers described in Table S3. PCR conditions were 95°C for 5min; 95°C for 30sec, 58°C for 30sec, 72°C for 1min, 36 cycles; 72°C for 10 min. The PCR product was then digested with dra1. The PCR product from Ler contains no restriction digest sites, while C24 contains 2 restriction sites.

### **Bisulphite PCR**

Frozen immature florescence were ground in a mortar and pestle. DNA from immature inflorescence was extracted using the Plant DNeasy Minikit (Qiagen) following manufactures instructions. 500ng to 2µg of genomic DNA was then bisulphite converted using the MethylEasy Xceed kit (Human Genetic Signatures). PCR conditions for At5g26345 were 95°C for 5min; 95°C for 1min, 55°C for 2min, 72°C for 3min, 5 cycles; 95°C for 1min, 55°C for 2min, 72°C for 1.5min, 40 cycles; 72°C for 6 min. The C24 and Col alleles for At4g24620 were amplified using two different PCR settings: 95°C for 5min; 95°C for 30sec, 55°C for 30sec, 72°C for 40sec, 40 cycles for Col alleles and 95°C for 5min; 95°C for 1min, 50°C for 2min, 72°C for 40sec, 5 cycles; 95°C for 1min, 53°C for 2min, 72°C for 40sec, 40 cycles; 72°C for 6 min for C24

alleles. Primer sequences are provided in Table S3. <sup>m</sup>C levels were determined from at least 12 clones. For the hybrids this involved obtaining at least 12 clones for each allele.

### **Whole genome bisulphite sequencing (Methyl-seq)**

Whole genome bisulphite sequencing was carried out as described (12). 5µg of genomic DNA from 6 individual F2 plants was sonicated to 200-500bp in size. The true-seq DNA sample prep kit (Illumina) was used to construct libraries which were then converted twice using the EPITECT bisulphite kit (Qiagen). Libraries underwent 12 cycles of amplification using KAPA HiFi Hot start Uracil+ Ready Mix (KAPA Biosystems). Libraries were then sequenced on a Hiseq 2500 obtaining pair-ended 100bp reads. Bisulphite conversion of libraries was checked using the chloroplast genome as a control (Table S4).

### **mRNA and sRNA sequencing**

Total RNA (including large and small) was isolated from immature inflorescence using the Direct-zol RNA Miniprep (Zymos Research). Both mRNA and sRNA libraries consisted of 2 biological replicates (pools of plants) for parental lines, with three biological replicates for the reciprocal hybrids. F1 replicates represented single plants which were the parental line for each of the F2 plants sequenced. The F2 plants sequenced were the same plants used in the methyl-seq experiment. Both mRNA and sRNA library preparation was performed at the Australian Genomic Research Facility, Melbourne Australia. mRNA libraries underwent 100bp pair-ended sequencing and sRNA libraries underwent SE 35bp sequencing on a Hiseq 2500 (Illumina; Table S5 & S6).

### **Methyl-seq analysis**

Methyl-seq libraries were mapped to the Arabidopsis Col TAIR 10 reference genome using Bismark v0.13.0 with the following parameters: bowtie 1 -q -n 2 -1 20 -k 2 --best --chunksmb 512. The parental and F1 hybrid lines were mapped using single end reads and were downloaded from the Gene expression omnibus GSE34658 and GSE35542 (Table S4). F2 individual libraries were mapped using pair ended alignments. <sup>m</sup>CG DMRs between parents were defined from 100bp tiled windows which had at least an 80% difference in <sup>m</sup>C, at least 10 total reads over the tile from each sample and contained at least two CG sites. <sup>m</sup>CHG DMRs between parents were defined from 100bp tiled windows which had at least a 50% difference in <sup>m</sup>C, at least 10 total reads over the tile from each sample and contained at least two CHG sites. Due to the high variability in <sup>m</sup>CHH, DMRs were defined when there was at least 10% difference in <sup>m</sup>CHH in immature inflorescence and at least 5% difference in <sup>m</sup>C within 15DAS samples (same methylated parent). The number of CHH DMRs was further filtered by removing any DMR in which the low methylated parental value was above 10%. Any 100bp DMRS which were adjacent to each other were merged into a single DMR. Windows which had an average read coverage below 5 in an F2 sample was excluded from the analysis.

Due to technical differences between old and new data sets, a scaling (d/a) normalization method was used to define regions with altered <sup>m</sup>C states in the F2 with the methylated parent normalized to 1, the low/un methylated parent normalized to -1 and the MPV equalling 0. The following equation was used for normalization:  $met_{da} = \frac{x - avg(y,z)}{\max(y,z - avg(y,z))}$

where  $x$  = initial <sup>m</sup>C value from sample,  $y$  = C24 and  $z$  = *Ler*. Regions which were homozygous for one parent were used to define the inheritance of altered <sup>m</sup>C states. TCM regions were defined when the F2 individual was homozygous for the low methylated parent and had a d/a normalization value of > 0.5. TCdM regions were defined when the F2 individual was homozygous for the high methylated parent and had a d/a normalization value <-0.5. Bedgraph files of <sup>m</sup>C level and coverage were loaded onto the CoGe genome browser. Whisker box plots were created in R using the ggplot2 package. Outlying values larger than normalized values 2 or -2 were excluded from the whisker box plots and statistical test. An ANOVA test in R was used to look for statistical significance between F1 15DAS <sup>m</sup>C normalized values and F1 Bud <sup>m</sup>C normalized values.

### **Mutant analysis**

<sup>m</sup>C values for Columbia and mutants in *met1*, *cmt2*, *cmt3*, *ddm1*, *ago4*, *polIV* and *polV* were downloaded from GSE39901 (21). The intersect function from BEDTools v2.24.0 with options `-wao` was used to map <sup>m</sup>C's from these files to the F2 inherited windows for each methyl context. The BEDTools function `groupby` with `-o` options `count, mean` was used to obtain coverage and average <sup>m</sup>C level for Col and the mutants in the inherited windows. Windows with no coverage in the Stroud et al data sets or were unmethylated were removed from the analysis. <sup>m</sup>CG methylated windows required 80% <sup>m</sup>C, <sup>m</sup>CHG methylated windows required at least 50% <sup>m</sup>C, while <sup>m</sup>CHH methylated windows required at least 10% <sup>m</sup>C. Enzymes important for the maintenance of <sup>m</sup>C at each window were defined when the <sup>m</sup>C in the mutants was different by at least 80% for <sup>m</sup>CG, 50% for <sup>m</sup>CHG or 10% for <sup>m</sup>CHH. Bedgraph files of <sup>m</sup>C level and coverage were loaded onto the CoGe genome browser.

### **SNP analysis**

Bis-SNP was used to detect SNPs within mapped reads from the methyl-seq reads. Output SNPs were then compared to known SNPs downloaded from the 1001 genome project (<http://www.1001genomes.org>). Only SNPs common to both lists were retained for genotyping. 10kb bins of SNP read numbers were used to define regions of the F2 as C24 homozygous, *Ler* homozygous and heterozygous. 10kb bins in which the genotype could not be defined were excluded from all analyses and the genotype designated NA (Table S1).

### **sRNA seq analysis**

Before mapping all sRNA libraries had adapters trimmed and tRNAs removed using custom perl scripts. sRNA reads were multi-mapped to the TAIR10 *Arabidopsis thaliana* Columbia genome using Biokanga v2.95 with the following options `-r5 -R500 -X` (Table S5). sRNAs were multi-mapped to avoid the possibility of calling a Methyl-seq window independent of sRNAs due to the removal of repetitive sRNA reads which would have mapped to the methyl window. The intersect function in BEDTools V2.24.0 was used to count the number of small RNA reads over each parental differentially methylated window. Only sRNAs where  $\geq 50\%$  of the read overlapped the differentially methylated windows <sup>m</sup>C window were retained. Samples were then normalized to reads per 10 million. This was done separately for <sup>m</sup>CG, <sup>m</sup>CHG and <sup>m</sup>CHH. <sup>m</sup>C windows were defined as sRNA-associated when at least one sample contained  $\geq 5$  normalized reads.

## **mRNA seq analysis**

mRNA libraries were first run through FastQC to check quality. Libraries were then mapped to the TAIR10 *Arabidopsis thaliana* Col reference genome using Biokanga v2.95 (<https://sourceforge.net/projects/biokanga/>) with the option -y45 to trim the mRNA reads (Table S6). The R package DESEQ (S1) was then used to determine differentially expressed genes using default settings. F2 expression levels were compared to the parent which matched the F2 genotype (C24, Ler or MPV). Differentially expressed genes required a p-value  $\leq 0.05$ .

## **Feature analysis**

The intersect function of BEDTools v2.24.0 with the -c option was used to count the number of Total DMRs and inherited DMRS in each feature. Each methyl context was treated separately. Windows were annotated to GeneBody/Pseudogene/Transposable Element Gene > Upstream > Downstream > Intergenic regions. These features were then split into TE associated or TE independent using the TAIR10 TE annotations. A Chi-square test was used to test for the enrichment for a particular feature in the inherited Windows. Upstream and downstream regions were  $\pm 1$ kb of the gene. If the adjacent gene was within 1kb of the gene, then the upstream or downstream region was truncated to the start/end of the next gene.

The intersect function in BEDTools v2.24.0 was used to intersect <sup>m</sup>C windows with TE positions in the genome. This was done for total DMR windows and for inherited windows. A chi-square test was used to test whether inherited windows were enriched for the presence of TEs

## **Candidate genes for expression changes associated from <sup>m</sup>C changes.**

For the scatterplots genes were identified as additive (contained either no <sup>m</sup>C window or showed no change in <sup>m</sup>C in the F2), TCM (genes which contained a TCM inherited) or TCdM (genes that contained a TCdM inherited window). Genes were further subdivided based on average expression level across all samples. Genes were divided into highly expressed (Top 25%), lowly expressed (bottom 25%) and middle expressed genes (Middle 50%).

The intersect function of BEDTools v2.24.0 with the -wa and -wb options were used to intersect inherited windows with upstream, downstream and gene bodies. Each list was then filtered for genes that contained inherited windows. Genes were further filtered by only retaining genes where an F2 individual showed a change in gene expression compared to parent ( $p \leq 0.05$ ) and the presence of an inherited window. From this list 34 genes were identified that are candidates for the altered <sup>m</sup>C states influencing gene expression patterns in the F2.

## **Northern Blots.**

Northern Blots were carried out as previously described (S2). Primers can be found in Table S3.

## **Supplementary references.**

- S1. Anders S & Huber W (2010) Differential expression analysis for sequence count data. *Genome Biology* 11(10)
- S2. Smith NA, Eamens AL, & Wang MB (2010) The presence of high-molecular-weight viral RNAs interferes with the detection of viral small RNAs. *Rna-a Publication of the Rna Society* 16(5):1062-1067.

# Supplementary figure 1

A.

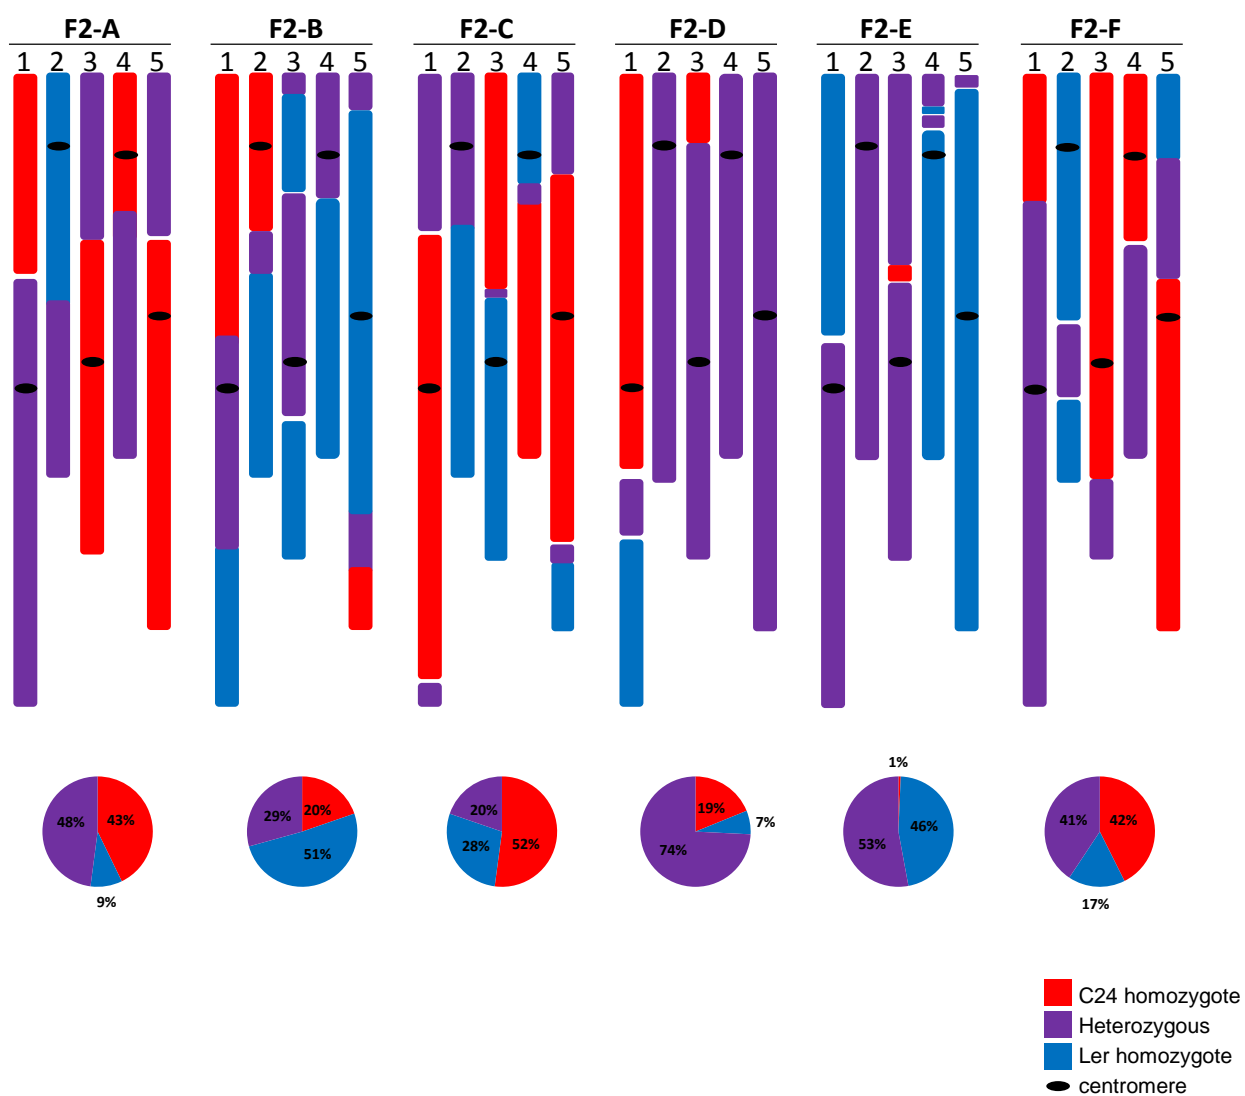

B.

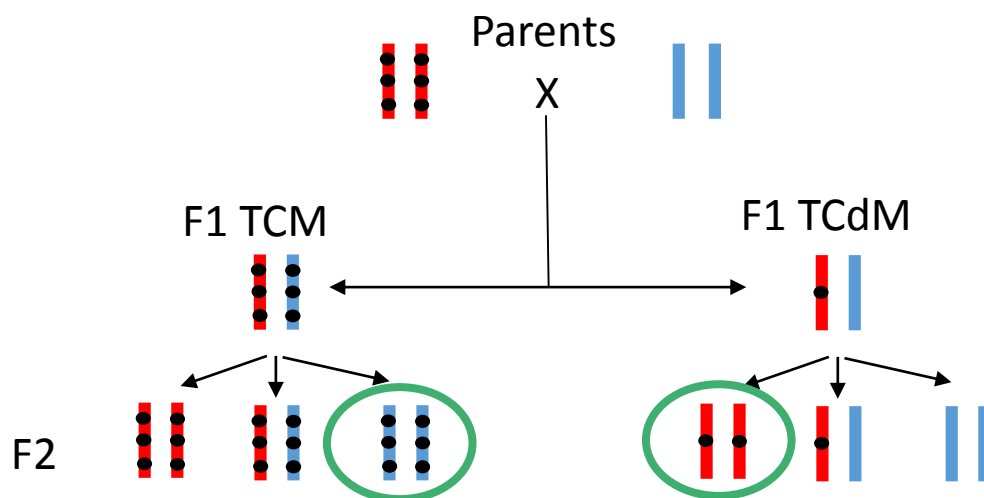

**Figure S1: Genotypes of F2 individuals.** A) Genotypes for each F2 individual. Pie charts give overall genotype frequency in each individual. Red represent C24 homozygous, blue represents *Ler* homozygous and purple represents heterozygous genotypes. B) Experimental design. F2 plants were analyzed for changes in  $^{13}\text{C}$  in regions homozygous for one of the parents. TCdM inherited windows were identified at homozygous regions in the F2 with  $^{13}\text{C}$  levels lower than that of the parental genotype. TCM inherited windows were identified at homozygous regions in the F2 individuals which demonstrated a  $^{13}\text{C}$  level above the parental genotype. The green circles highlight the allele combinations required to define inherited windows.

# Supplementary figure 2

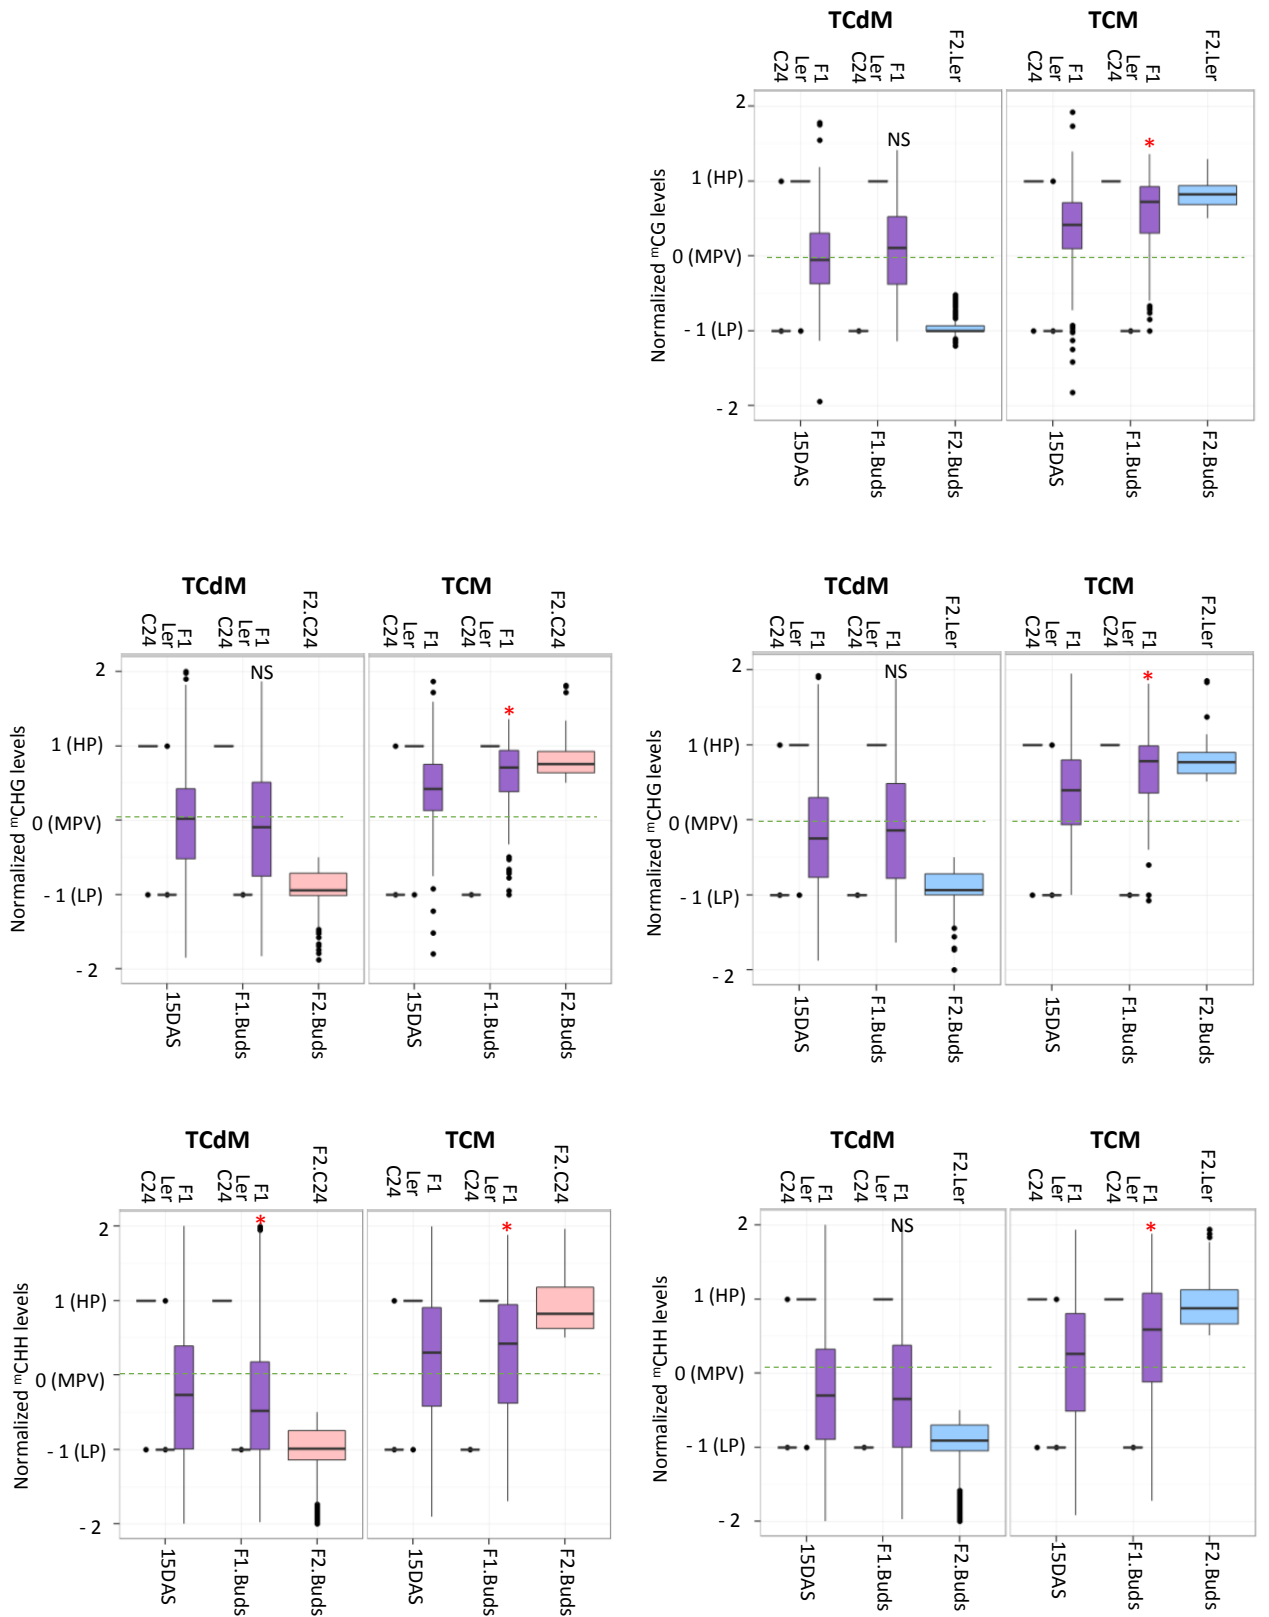



**Figure S2: Inherited windows in the F2 show TCM in two F1 time points.** Whisker box plots of <sup>m</sup>C in F1 15 das seedlings (15DAS), F1 immature inflorescence (F1.Buds) and F2 immature inflorescence (F2.Buds). F1 <sup>m</sup>C levels at the two points are represented in purple. F1 <sup>m</sup>C levels represent windows in the F1 which were homozygous for C24 or homozygous for Ler in the F2. C24.F2 represents inherited windows which were homozygous for C24 (light red). *Ler*.F2 represents inherited windows homozygous for *Ler* (light blue). Y axis represents context specific normalized <sup>m</sup>C levels with C24 or *Ler* as the methylated parent (HP; 1) or low methylated parent (LP; -1). MPV (0) is represented as a dotted green line. The \* above F1.Buds represents a statistical difference in normalized <sup>m</sup>C levels between F1 15DAS and F1 Buds ( $p \leq 0.01$ ; ANOVA test). NS = normalized <sup>m</sup>C levels between F1 15DAS and F1 Buds which are not statistically significant.

## Supplementary figure 3

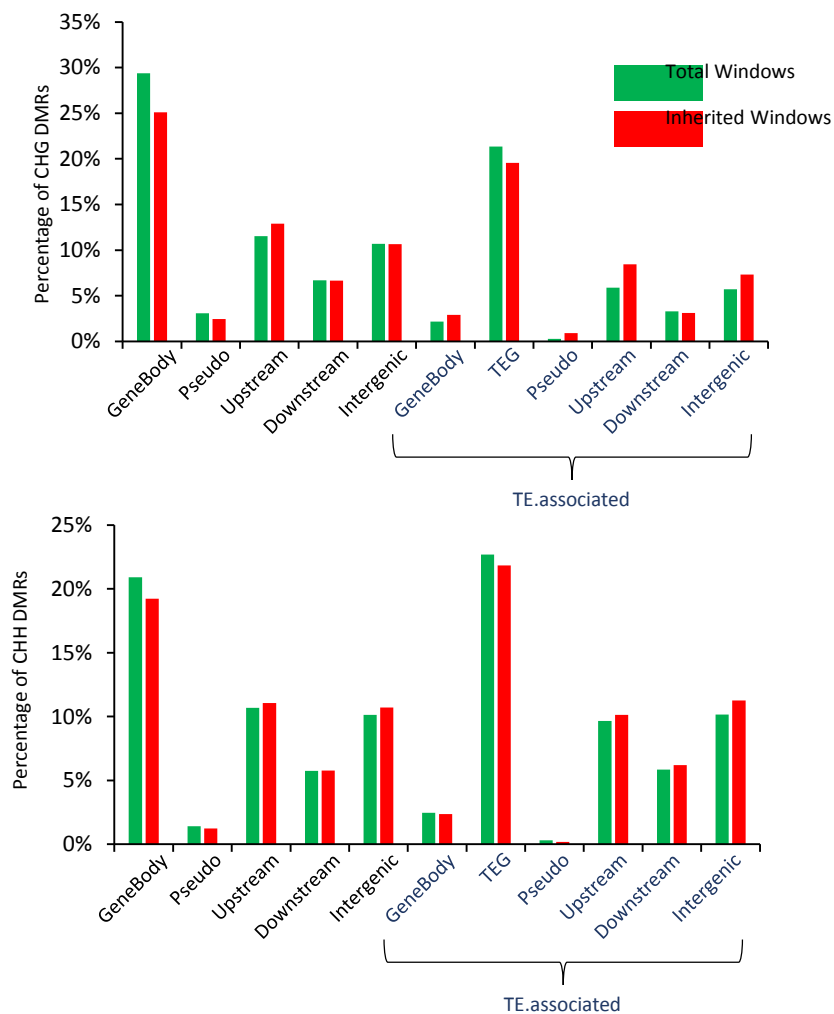

**Figure S3: Genome locations of inherited windows for  $mCHG$  and  $mCHH$ .** Features were split into those overlapping TEs (TE.associated) and features not associated with TEs. Features mapped to include intragenic (GeneBody), Transposable Element Genes (TEG), Pseudogenes (Pseudo), 1kb upstream (Upstream), 1kb Downstream (Downstream), Intergenic

# Supplementary figure 4

A.

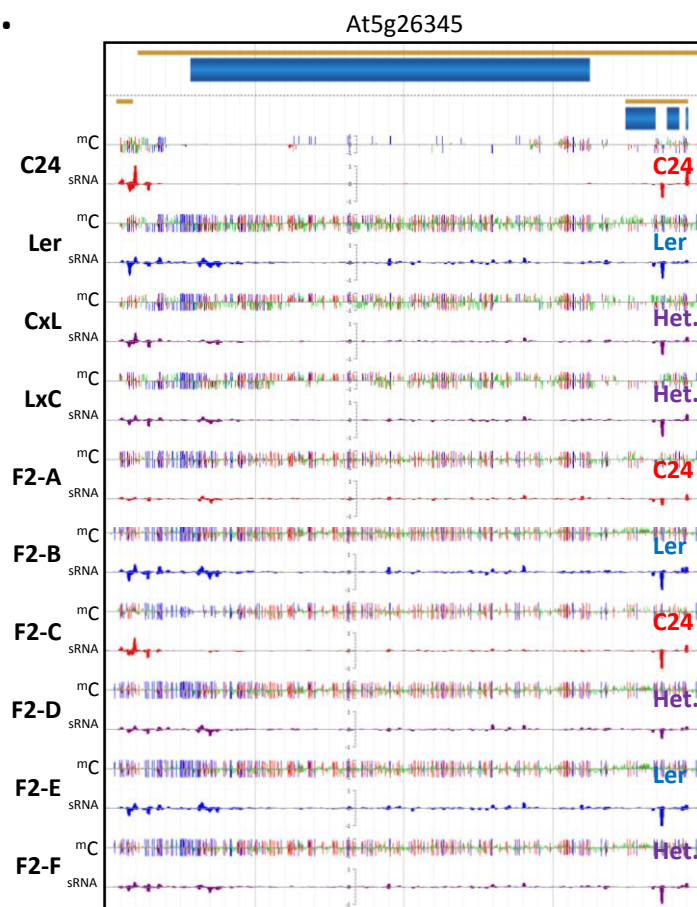

B.

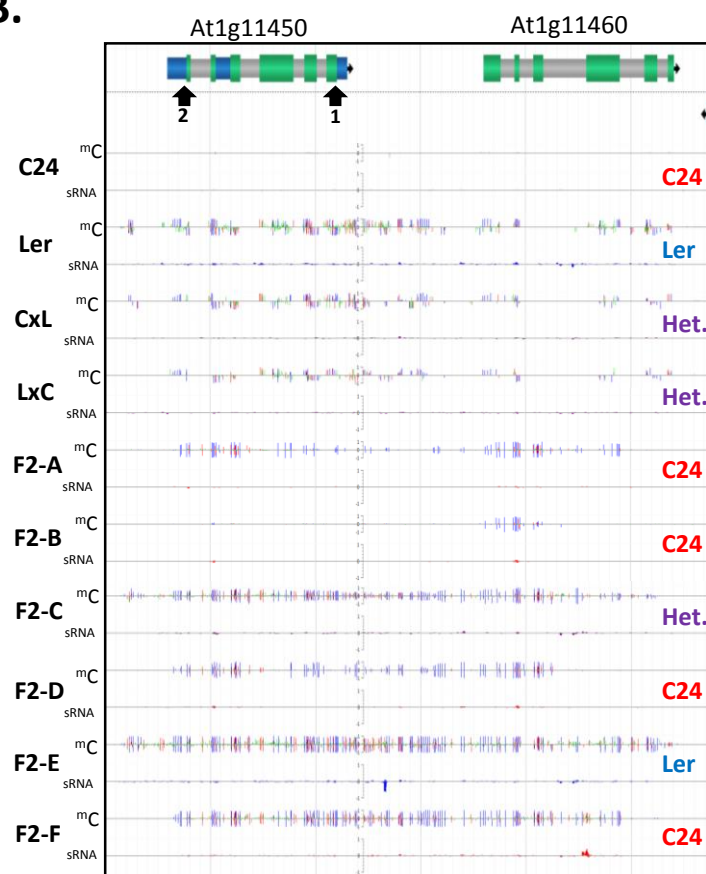

**Figure S4: Examples of stable (A) and variable inheritance (B).** Genome browser shot of <sup>m</sup>C and sRNA levels in parents, C24 x *Ler* F1 hybrid (CxL), *Ler* x C24 F1 hybrid (LxC) and six individual F2 plants. In sRNA tracks genotypes are on the right of each track with sRNA track colour representing C24 homozygous (red), *Ler* homozygous (blue) and heterozygous (purple). For <sup>m</sup>C tracks blue represents <sup>m</sup>CG, red represents <sup>m</sup>CHG and green represents <sup>m</sup>CHH. In (B) arrows represent primer sets used in Figure 3A.

## Supplementary figure 5

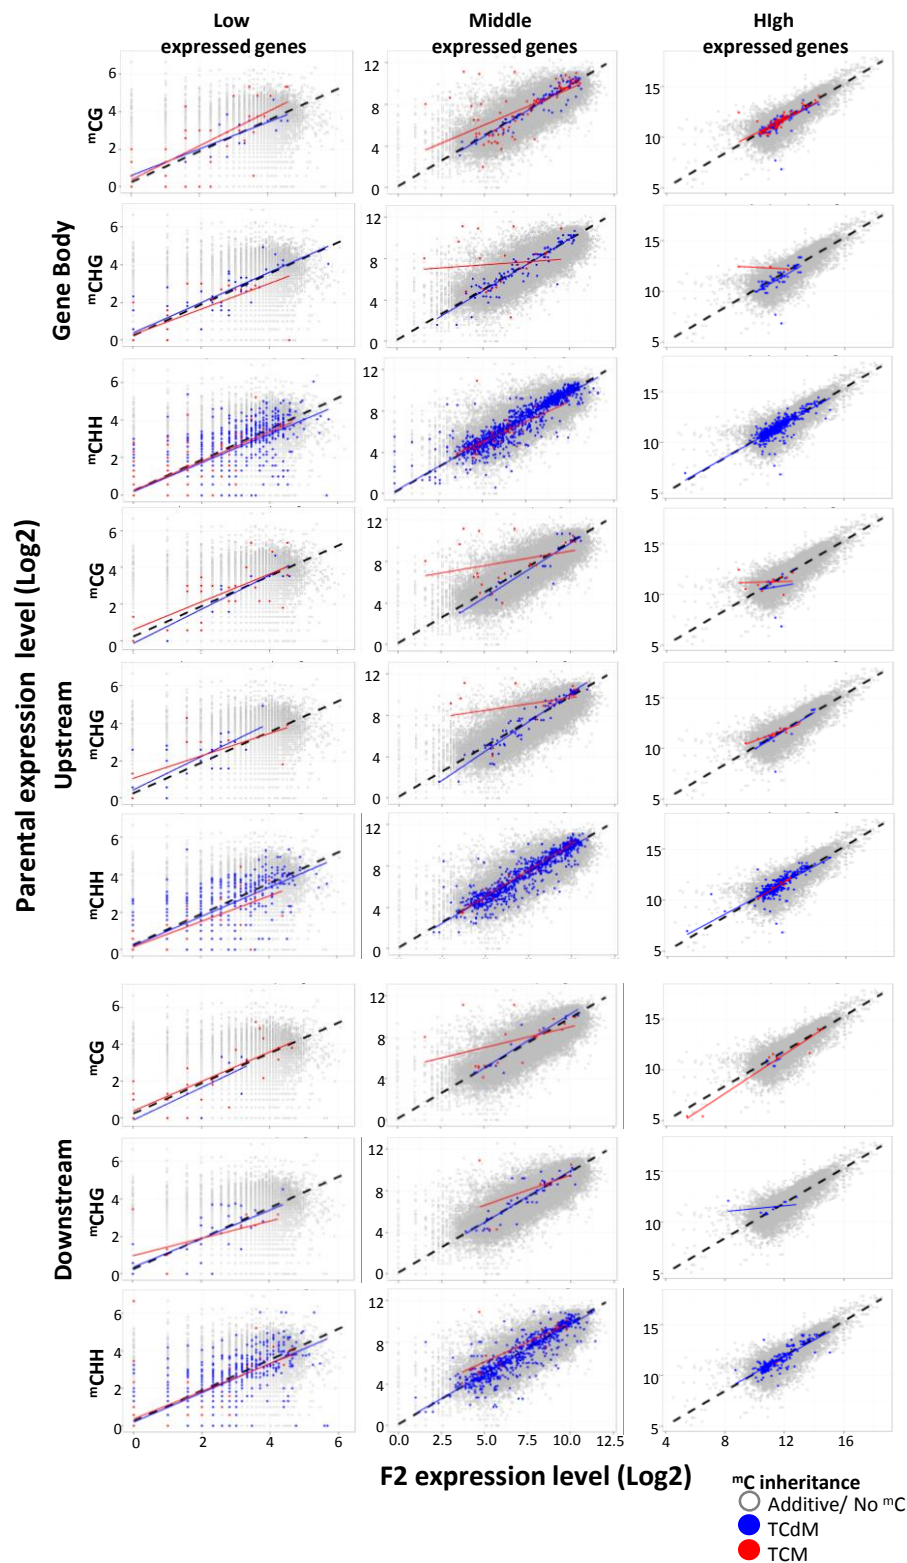

**Figure S5: mC inherited windows impact on gene expression.** mC scatterplots of gene expression levels in homozygous regions of the F2 (X axis) and expression level in the parent of origin (Y axis). Genes with additive mC or no mC are in grey. Genes overlapping a TCM inherited window are in red and Genes overlapping a TCdM window are in blue. Regression lines for additive, TCM and TCdM are drawn in dotted black, red and blue respectively.

# Supplementary figure 6

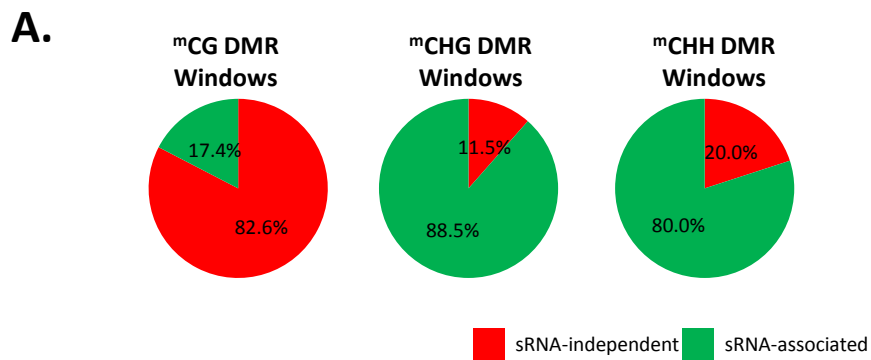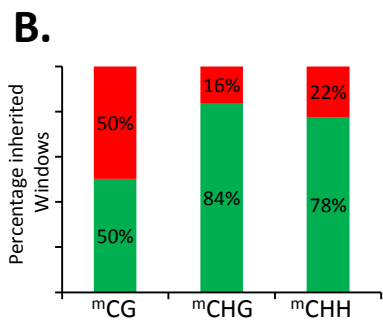

**C.**

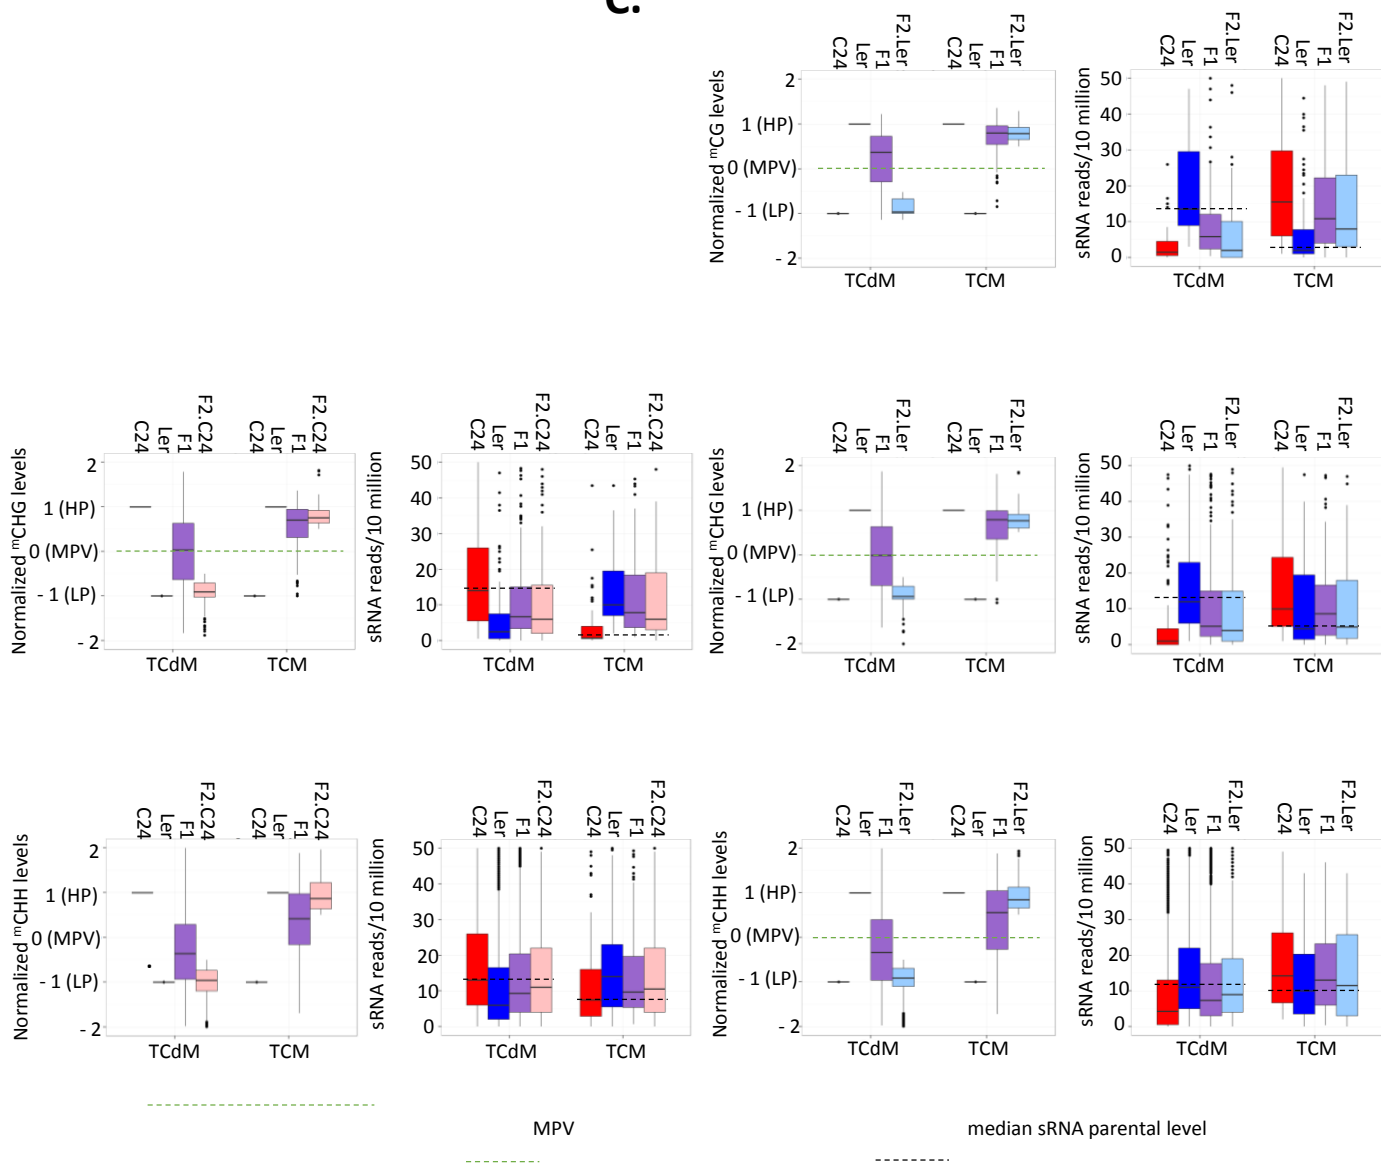

**Figure S6: Relationship between inherited windows and sRNAs.** A) Proportion of DMR windows which were sRNA-associated or sRNA-independent. B) Proportion of inherited windows which were sRNA-associated or sRNA-independent. C) Whisker box plots of <sup>m</sup>C levels in sRNA-associated inherited windows and their corresponding levels of sRNAs in parental lines, F1 hybrids (immature inflorescence) and the F2 generation. C24 is represented as red with F2 homozygous for C24 (C24.F2) represented as light red. *Ler* is represented as blue with F2 homozygous for *Ler* (*Ler*.F2) represented as light blue. In the <sup>m</sup>C whisker box plots Y axis represents context specific normalized <sup>m</sup>C levels with C24 or *Ler* as the methylated parent (HP; 1) or low methylated parent (LP; -1). TCM defines inherited windows with <sup>m</sup>C levels above that of the parental genotype. TCdM defines inherited windows with <sup>m</sup>C levels below that of the parental genotype.

## Supplementary figure 7

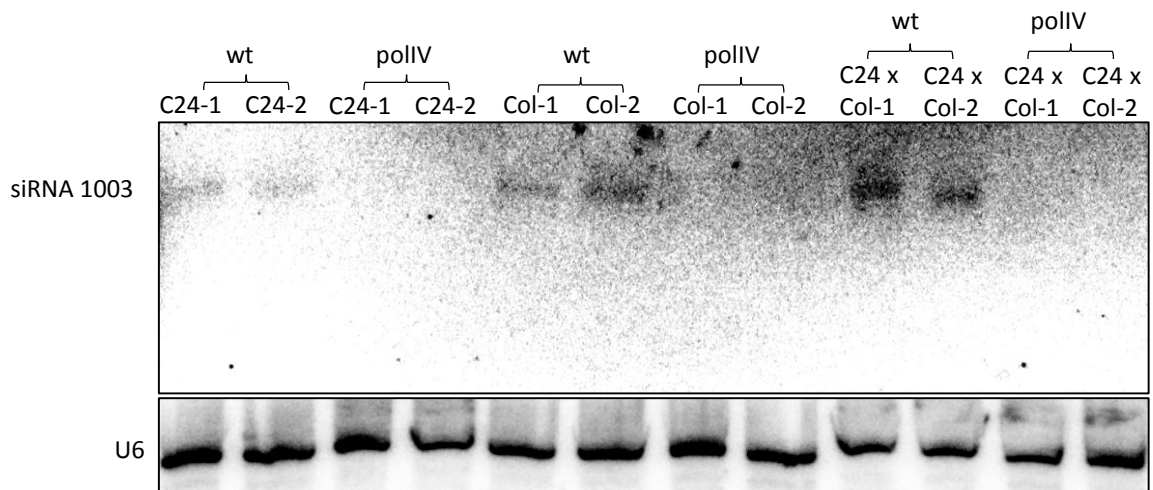

**Figure S7: Importance of sRNAs for the initiation of TCM events.** *polIV* hybrids lack the 24nt siRNA 1003. There are two biological replicates for each sample. U6 acts as a loading control for the northern.



## Supplementary figure 8

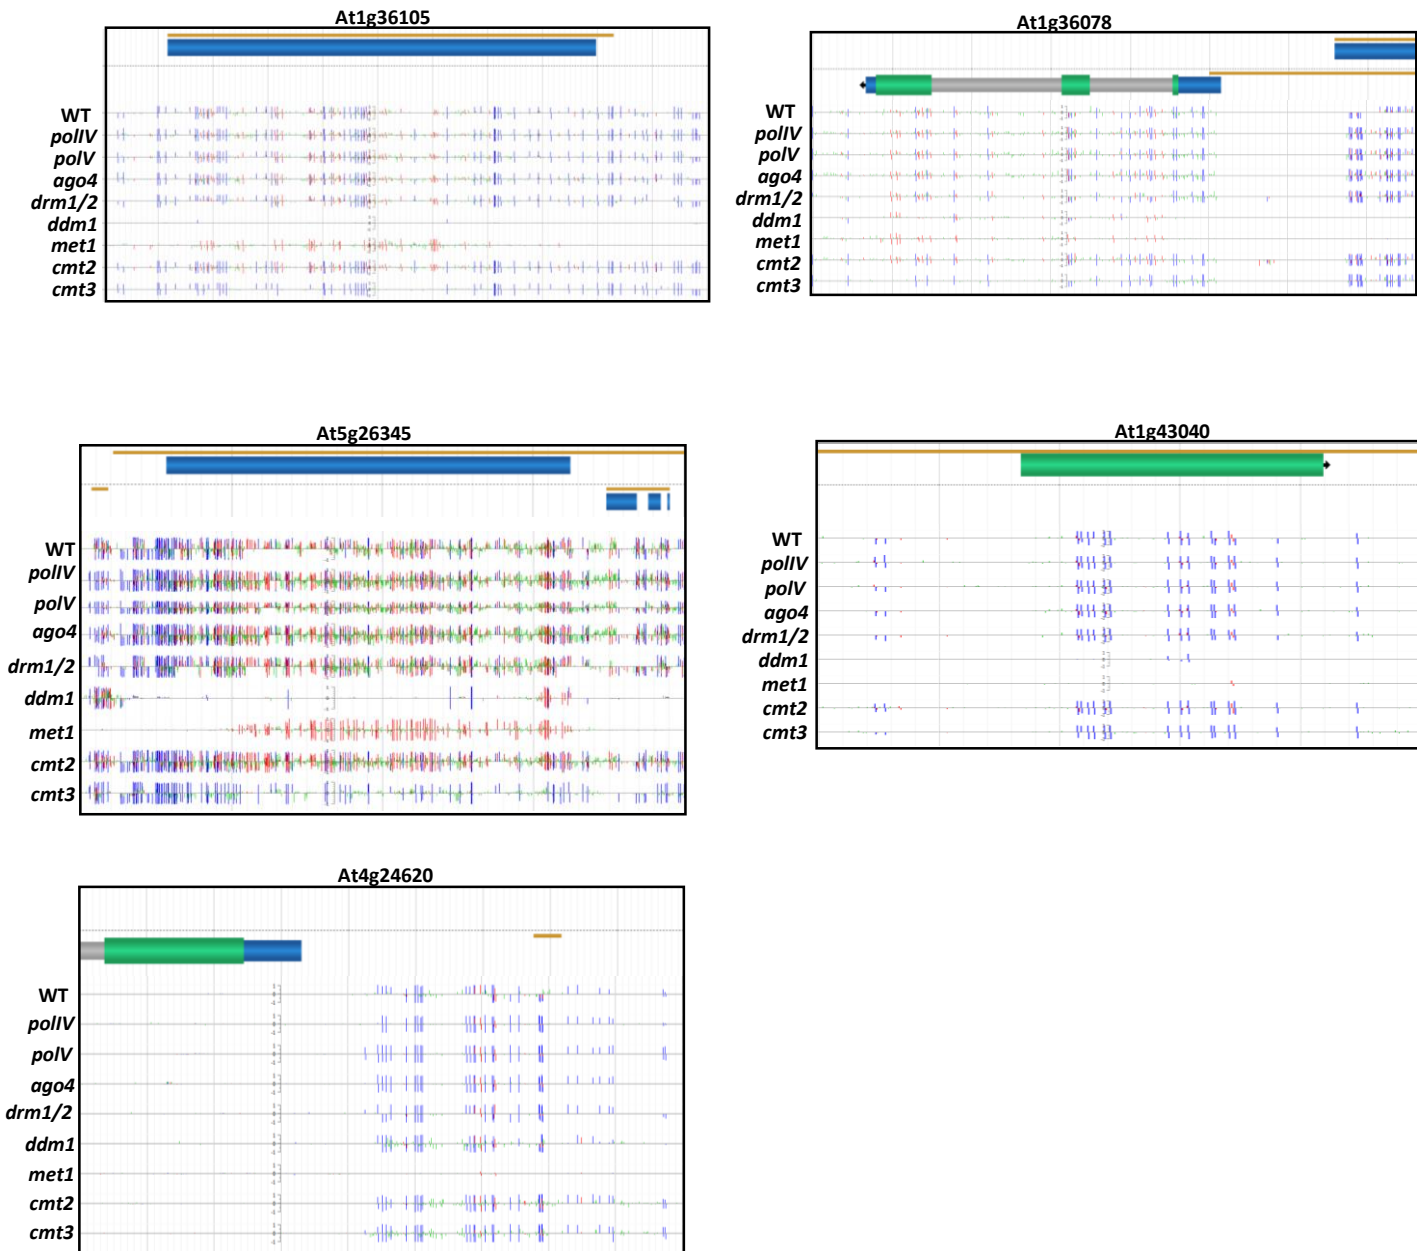

**Figure S8: mC patterns at regions which undergo TCM in mutants for mC maintenance enzymes.** A browser shot of Col wt and Col mutant lines at five regions known to undergo TCM in C24/Ler hybrids. For mC tracks blue represents mCG, red represents mCHG and green represents mCHH.

# Supplementary Table 1

| F2-A |          |          |          | F2-B |          |          |          | F2-C |          |          |          | F2-D |          |          |          | F2-E |          |          |          | F2-F |          |          |          |
|------|----------|----------|----------|------|----------|----------|----------|------|----------|----------|----------|------|----------|----------|----------|------|----------|----------|----------|------|----------|----------|----------|
| Chr  | Start    | Stop     | Genotype |
| 1    | 0        | 9870000  | C24      | 1    | 0        | 12730000 | C24      | 1    | 0        | 7780000  | Both     | 1    | 0        | 19040000 | C24      | 1    | 0        | 12750000 | Ler      | 1    | 0        | 6140000  | C24      |
| 1    | 9870001  | 9919999  | NA       | 1    | 12730001 | 12759999 | NA       | 1    | 7780001  | 7829999  | NA       | 1    | 19040001 | 19419999 | NA       | 1    | 12750001 | 12909999 | NA       | 1    | 6140001  | 6179999  | NA       |
| 1    | 9920000  | 30427671 | Both     | 1    | 12760000 | 22900000 | Both     | 1    | 7830000  | 29270000 | C24      | 1    | 19420000 | 22140000 | Both     | 1    | 12910000 | 30427671 | Both     | 1    | 6180000  | 30427671 | Both     |
| 2    | 0        | 11040000 | Ler      | 1    | 22900001 | 22929999 | NA       | 1    | 29270001 | 29399999 | NA       | 1    | 22140001 | 22319999 | NA       | 2    | 0        | 19698289 | Both     | 2    | 0        | 11890000 | Ler      |
| 2    | 11039999 | 11099999 | NA       | 1    | 22930000 | 30427671 | Ler      | 1    | 29400000 | 30427671 | Both     | 1    | 22320000 | 30427671 | Ler      | 3    | 0        | 9260000  | Both     | 2    | 11890001 | 11939999 | NA       |
| 2    | 11100000 | 19698289 | Both     | 2    | 0        | 7640000  | C24      | 2    | 0        | 7490000  | Both     | 2    | 0        | 19698289 | Both     | 3    | 9260001  | 9279999  | NA       | 2    | 11940000 | 15570000 | Both     |
| 3    | 0        | 8290000  | Both     | 2    | 7640001  | 7659999  | NA       | 2    | 7490001  | 7499999  | NA       | 3    | 0        | 3300000  | C24      | 3    | 9280000  | 10020000 | C24      | 2    | 15570001 | 15609999 | NA       |
| 3    | 8290000  | 23459830 | C24      | 2    | 7660000  | 9720000  | Both     | 2    | 7500000  | 19698289 | Ler      | 3    | 3300001  | 3379999  | NA       | 3    | 10020001 | 10039999 | NA       | 2    | 15610000 | 19698289 | Ler      |
| 4    | 0        | 6990000  | C24      | 2    | 9720001  | 9769999  | NA       | 3    | 0        | 10570000 | C24      | 3    | 3380000  | 23459830 | Both     | 3    | 10040000 | 23459830 | Both     | 3    | 0        | 19410000 | C24      |
| 4    | 6989999  | 6999999  | NA       | 2    | 9770000  | 19698289 | Ler      | 3    | 10570001 | 10579999 | NA       | 4    | 0        | 18585056 | Both     | 4    | 0        | 1610000  | Both     | 3    | 19410001 | 19499999 | NA       |
| 4    | 7000000  | 18585056 | Both     | 3    | 0        | 1100000  | Both     | 3    | 10580000 | 10940000 | Both     | 5    | 0        | 26975502 | Both     | 4    | 1610001  | 1619999  | NA       | 3    | 19500000 | 23459830 | Both     |
| 5    | 0        | 7980000  | Both     | 3    | 1100000  | 5790000  | Ler      | 3    | 10940001 | 10999999 | NA       | 4    | 1620000  | 2050000  | Ler      | 4    | 0        | 8080000  | C24      | 4    | 0        | 8080000  | C24      |
| 5    | 7979999  | 8009999  | NA       | 3    | 5790001  | 5859999  | NA       | 3    | 11000000 | 23459830 | Ler      | 4    | 2050001  | 2099999  | NA       | 4    | 8080001  | 8139999  | NA       | 4    | 8080001  | 8139999  | NA       |
| 5    | 8010000  | 26975502 | C24      | 3    | 5860000  | 16620000 | Both     | 4    | 0        | 5490000  | Ler      | 4    | 2100000  | 2780000  | Both     | 4    | 8140000  | 18585056 | Both     | 4    | 8140000  | 18585056 | Both     |
|      |          |          |          | 3    | 16620001 | 16779999 | NA       | 4    | 5490001  | 5499999  | NA       | 4    | 2780001  | 2789999  | NA       | 5    | 0        | 4090000  | Ler      | 5    | 0        | 4090000  | Ler      |
|      |          |          |          | 3    | 16780000 | 23459830 | Ler      | 4    | 5500000  | 6350000  | Both     | 4    | 2790000  | 18585056 | Ler      | 5    | 4090001  | 4099999  | NA       | 5    | 4090001  | 4099999  | NA       |
|      |          |          |          | 4    | 0        | 6100000  | Both     | 4    | 6350001  | 6359999  | NA       | 5    | 0        | 750000   | Both     | 5    | 4100000  | 9990000  | Both     | 5    | 4100000  | 9990000  | Both     |
|      |          |          |          | 4    | 6100000  | 18600000 | Ler      | 4    | 6360000  | 18585056 | C24      | 5    | 750001   | 759999   | NA       | 5    | 9990000  | 26975502 | C24      | 5    | 9990000  | 26975502 | C24      |
|      |          |          |          | 5    | 0        | 1900000  | Both     | 5    | 0        | 4950000  | Both     | 5    | 760000   | 26975502 | Ler      |      |          |          |          |      |          |          |          |
|      |          |          |          | 5    | 1900001  | 1909999  | NA       | 5    | 4950001  | 4969999  | NA       |      |          |          |          |      |          |          |          |      |          |          |          |
|      |          |          |          | 5    | 1910000  | 21280000 | Ler      | 5    | 4970000  | 22620000 | C24      |      |          |          |          |      |          |          |          |      |          |          |          |
|      |          |          |          | 5    | 21280001 | 21289999 | NA       | 5    | 22620001 | 22759999 | NA       |      |          |          |          |      |          |          |          |      |          |          |          |
|      |          |          |          | 5    | 21290000 | 23820000 | Both     | 5    | 22760000 | 23640000 | Both     |      |          |          |          |      |          |          |          |      |          |          |          |
|      |          |          |          | 5    | 23820001 | 23829999 | NA       | 5    | 23640001 | 23669999 | NA       |      |          |          |          |      |          |          |          |      |          |          |          |
|      |          |          |          | 5    | 23830000 | 26975502 | C24      | 5    | 23670000 | 26975502 | Ler      |      |          |          |          |      |          |          |          |      |          |          |          |

**Table S1: F2 genotypes.** C24 means C24 homozygous, Ler means Ler homozygous and Both means heterozygous regions. Regions where the genotype could not be defined were labelled as NA.

# Supplementary Table 2

| Gene.ID   | Gene family               | Name                                                                              | Short description                                                        |
|-----------|---------------------------|-----------------------------------------------------------------------------------|--------------------------------------------------------------------------|
| AT1G11450 | protein_coding            | nodulin MtN21 /EamA-like transporter family protein                               | nodulin MtN21 /EamA-like transporter family protein                      |
| AT1G11460 | protein_coding            | nodulin MtN21 /EamA-like transporter family protein                               | nodulin MtN21 /EamA-like transporter family protein                      |
| AT1G33970 | protein_coding            | P-loop containing nucleoside triphosphate hydrolases superfamily protein          | P-loop containing nucleoside triphosphate hydrolases superfamily protein |
| AT1G36078 | protein_coding            | unknown protein                                                                   | .                                                                        |
| AT1G42852 | transposable_element_gene |                                                                                   | transposable element gene                                                |
| AT1G47210 | protein_coding            | cyclin-dependent protein kinase 3                                                 | cyclin-dependent protein kinase 3;2                                      |
| AT1G70890 | protein_coding            | MLP-like protein 43 (MLP43)                                                       | MLP-like protein 43                                                      |
| AT1G78160 | protein_coding            | pumilio 7 (PUM7)                                                                  | pumilio 7                                                                |
| AT2G15160 | transposable_element_gene |                                                                                   | transposable element gene                                                |
| AT2G16140 | transposable_element_gene | similar to DNA binding [Arabidopsis thaliana] (TAIR:AT3G47680.1)                  | transposable element gene                                                |
| AT2G25370 | protein_coding            | RING/U-box superfamily protein                                                    | RING/U-box superfamily protein                                           |
| AT2G29350 | protein_coding            | senescence-associated gene 13 (SAG13)                                             | senescence-associated gene 13                                            |
| AT2G43160 | protein_coding            | ENTH/VHS family protein                                                           | ENTH/VHS family protein                                                  |
| AT3G32023 | transposable_element_gene |                                                                                   | transposable element gene                                                |
| AT3G43350 | transposable_element_gene | similar to unknown protein [Arabidopsis thaliana] (TAIR:AT1G52960.1)              | transposable element gene                                                |
| AT3G44205 | transposable_element_gene |                                                                                   | transposable element gene                                                |
| AT3G50625 | transposable_element_gene |                                                                                   | transposable element gene                                                |
| AT4G04030 | protein_coding            | ovate family protein 9 (OFP9)                                                     | ovate family protein 9                                                   |
| AT4G09640 | protein_coding            | Protein of unknown function (DUF803)                                              | Protein of unknown function (DUF803)                                     |
| AT4G10201 | pseudogene                |                                                                                   | .                                                                        |
| AT4G10220 | protein_coding            | Protein of Unknown Function (DUF239)                                              | Protein of Unknown Function (DUF239)                                     |
| AT4G16162 | protein_coding            | Leucine-rich repeat (LRR) family protein                                          | Leucine-rich repeat (LRR) family protein                                 |
| AT4G20480 | protein_coding            | Putative endonuclease or glycosyl hydrolase                                       | Putative endonuclease or glycosyl hydrolase                              |
| AT4G26140 | protein_coding            | beta-galactosidase 12 (BGAL12)                                                    | beta-galactosidase 12                                                    |
| AT5G07770 | protein_coding            | Actin-binding FH2 protein                                                         | Actin-binding FH2 protein                                                |
| AT5G20750 | transposable_element_gene | similar to Ulp1 protease family protein [Arabidopsis thaliana] (TAIR:AT3G42690.1) | transposable element gene                                                |
| AT5G26345 | transposable_element_gene |                                                                                   | transposable element gene                                                |
| AT5G27345 | transposable_element_gene |                                                                                   | transposable element gene                                                |
| AT5G47530 | protein_coding            | Auxin-responsive family protein                                                   | Auxin-responsive family protein                                          |
| AT5G52067 | pseudogene                |                                                                                   | .                                                                        |
| AT5G54585 | protein_coding            | unknown protein                                                                   | .                                                                        |
| AT5G59630 | pseudogene                |                                                                                   | .                                                                        |
| AT5G60430 | protein_coding            | drug transmembrane transporters                                                   | drug transmembrane transporters;antiporters                              |
| AT5G66380 | protein_coding            | folate transporter 1 (FOLT1)                                                      | folate transporter 1                                                     |

**Table S2: Candidate genes.** Genes which may have their expression patterns influenced by the inheritance of altered <sup>m</sup>C states into the F2 generation.

# Supplementary Table 3

## Primers for McrBC qRT-PCR

|                     |                         |
|---------------------|-------------------------|
| At3g43340 forward   | GGTCACGCTCACAGTTCTCTC   |
| At3g43340 reverse   | TCTTTTAGACTCCACCGCTCA   |
| At5g26345 forward   | AGAGACAGCAATTGCGAAG     |
| At5g26345 reverse   | TGCAAGAATCTCACCTTCA     |
| At4g24620 forward   | TGATACGATGGTAGCTTTTCG   |
| At4g24620 reverse   | AACTTTAACAGGATCCGACG    |
| At1g36078 forward   | ACTGGGGACAAATACTTACTGC  |
| At1g36078 reverse   | AACATTCTGCTGCTCGTAGT    |
| At1g11450-1 forward | GCTATACAGTGTGATTGGATCAG |
| At1g11450-1 reverse | ACTAATTTACGACAATGAAGCCA |
| At1g11450-2 forward | TTCAAGAAAGAGAGAACGAGGG  |
| At1g11450-2 reverse | AAATAGGCGATAGGAACCAGA   |
| ACTIN forward       | CTAAGCTCTCAAGATCAAAGGC  |
| ACTIN reverse       | AACATTGCAAAGAGTTTCAAGG  |

## genotype primers for At1g11450

|                        |                         |
|------------------------|-------------------------|
| At1g11450 geno forward | GCTATACAGTGTGATTGGATCAG |
| At1g11450 geno reverse | TCTCCCAATATGGGTATCGAA   |

## Primers for Bisulphite PCR

|                   |                              |
|-------------------|------------------------------|
| At4g24620 forward | AATGTTGATTGGGAGTAGGGTTGTT    |
| At4g24620 reverse | ACRTAATTACATTTTTATCTTTTTRTTT |
| At5g26345 forward | ATTAAGGATGAGATAATGATGAGGTATA |
| At5g26345 reverse | ATCTCCATACACCTTCTTCAATTA     |

## Primers for Northern

|            |                          |
|------------|--------------------------|
| siRNA 1003 | ATGCCAAGTTTGGCCTCACGGTCT |
| U6         | AGGGGCCATGCTAATCTTCTC    |

**Table S3: Primer sets.** For bisulphite PCR primers Y = C or T, while R = A or G

# Supplementary Table 4

| Sample     | sequence_type | # raw_reads | # ft_reads | %reads_pass_ft | mapping_eff | unique_map | no_align | multi_align | prop_CG | prop_CHG | prop_CHH | conversion_rate |
|------------|---------------|-------------|------------|----------------|-------------|------------|----------|-------------|---------|----------|----------|-----------------|
| C24 15das  | se            | 151580154   | 142371568  | 0.939          | 41.7        | 59421294   | 37083269 | 45867005    | 27.7    | 9.8      | 4.7      | 99.49           |
| Ler 15 das | se            | 136470326   | 129093613  | 0.946          | 42.5        | 54886741   | 27808512 | 46398360    | 28.8    | 10.1     | 4        | 99.66           |
| CxL 15 das | se            | 133946590   | 129209005  | 0.965          | 46.2        | 59727776   | 19989126 | 49492103    | 26.9    | 8.9      | 3.2      | 99.85           |
| LxC 15 das | se            | 129567407   | 123082281  | 0.95           | 45.1        | 55549484   | 22197618 | 45335179    | 29.3    | 10.7     | 4.2      | 99.81           |
| C24 Buds   | se            | 95538869    | 94200750   | 0.986          | 52.6        | 49563153   | 10304029 | 34333568    | 31.7    | 14.7     | 4.7      | 99.4            |
| Ler Buds   | se            | 96575435    | 96136492   | 0.995          | 57.3        | 55119854   | 8771838  | 32244800    | 30.5    | 14       | 4.5      | 99.51           |
| CxL Buds   | se            | 89633151    | 89444102   | 0.998          | 53.7        | 48014033   | 11234834 | 30195235    | 39.2    | 20.8     | 6.7      | 99.15           |
| LxC Buds   | se            | 85381984    | 85153743   | 0.997          | 55.5        | 47278791   | 9976515  | 27898437    | 35.3    | 17       | 4.8      | 99.93           |
| F2-A       | pe            | 227558376   | 211987838  | 0.932          | 56.4        | 59812488   | 37988263 | 8193168     | 18.3    | 5        | 0.9      | 99.93           |
| F2-B       | pe            | 252962014   | 234368164  | 0.926          | 53.3        | 62426780   | 44664048 | 10093254    | 23      | 7.1      | 1.2      | 99.93           |
| F2-C       | pe            | 214304058   | 205718350  | 0.96           | 56          | 57614035   | 37723678 | 7521462     | 20.3    | 5.4      | 1        | 99.95           |
| F2-D       | pe            | 220498502   | 212091928  | 0.962          | 57.7        | 61233647   | 35689575 | 9122742     | 19.7    | 5.2      | 0.9      | 99.95           |
| F2-E       | pe            | 233844754   | 228271582  | 0.976          | 59.2        | 67581050   | 37324805 | 9229936     | 20.8    | 6.1      | 1.1      | 99.95           |
| F2-F       | pe            | 201910086   | 197259618  | 0.977          | 58.1        | 57347740   | 32768753 | 8513316     | 19.4    | 5.3      | 0.9      | 99.95           |

**Table S4: Mapping of methyl-seq libraries.**

pe = paired end, se = single end

# Supplementary Table 5

|           | Starting read Numbers | Filtered read numbers (ex. tRNA) | Unique  | Multi   | No Alignment | loci aligned to | Mapped   | Normalization factor to 10,000,000 |
|-----------|-----------------------|----------------------------------|---------|---------|--------------|-----------------|----------|------------------------------------|
| C24_RepA  | 38967013              | 16103555                         | 7645238 | 6879909 | 1578401      | 59121426        | 14525147 | 0.688461                           |
| C24_RepB  | 34867470              | 11018145                         | 5325708 | 4810210 | 882226       | 40672269        | 10135918 | 0.986590                           |
| Ler_RepA  | 37121173              | 11035432                         | 5212509 | 5070941 | 751977       | 40840458        | 10283450 | 0.972436                           |
| Ler_RepB  | 40900325              | 13480295                         | 6982759 | 5511203 | 986329       | 47919445        | 12493962 | 0.800387                           |
| C24xLer1  | 16396764              | 8960089                          | 4714434 | 3534131 | 711524       | 33273727        | 8248565  | 1.212332                           |
| C24xLer6  | 16285609              | 8807191                          | 4716323 | 3383991 | 706877       | 32000136        | 8100314  | 1.234520                           |
| C24xLer7  | 18335163              | 10154555                         | 5295011 | 4066651 | 792893       | 38205803        | 9361662  | 1.068186                           |
| LerxC245  | 19203437              | 11915249                         | 6084895 | 4910124 | 920230       | 45690108        | 10995019 | 0.909503                           |
| LerxC247  | 16785334              | 10362400                         | 5540810 | 3977353 | 844237       | 38585364        | 9518163  | 1.050623                           |
| LerxC2410 | 19054826              | 12673778                         | 6600511 | 5109443 | 963824       | 47638910        | 11709954 | 0.853974                           |
| F2-A      | 16150068              | 9758759                          | 4960628 | 4018883 | 779248       | 38245718        | 8979511  | 1.113646                           |
| F2-B      | 19774107              | 11879938                         | 6699094 | 4226499 | 954345       | 43211657        | 10925593 | 0.915282                           |
| F2-C      | 15329531              | 8607839                          | 4941626 | 2974428 | 691785       | 27616815        | 7916054  | 1.263256                           |
| F2-D      | 16076577              | 10152266                         | 5291239 | 4063192 | 797835       | 39645496        | 9354431  | 1.069012                           |
| F2-E      | 16237841              | 10938496                         | 5790901 | 4274461 | 873134       | 41927212        | 10065362 | 0.993506                           |
| F2-F      | 16272803              | 9682653                          | 5175494 | 3733943 | 773216       | 36451672        | 8909437  | 1.122405                           |

**Table S5: Mapping of sRNA libraries.** sRNA libraries were multi-mapped using Biokanga v 2.95.0. For the analysis reads were normalized to reads per 10 million

# Supplementary Table 6

|           | Starting read Numbers | Aligned   | Multi loci | No Alignment |
|-----------|-----------------------|-----------|------------|--------------|
| C24_RepA  | 91458684              | 55415989  | 10753486   | 25047510     |
| C24_RepB  | 54115674              | 38286641  | 5410875    | 10233292     |
| Ler_RepA  | 93704896              | 59255991  | 10580653   | 23622095     |
| Ler_RepB  | 50998016              | 19195733  | 25273254   | 6419668      |
| C24xLer1  | 21629786              | 17840289  | 1042566    | 2623703      |
| C24xLer6  | 72572934              | 60378078  | 3505332    | 8286232      |
| C24xLer7  | 20662110              | 17051049  | 755179     | 2729948      |
| LerxC245  | 39527950              | 32916322  | 5333576    | 1058505      |
| LerxC247  | 51728084              | 39206533  | 1306651    | 11039807     |
| LerxC2410 | 20696852              | 17502041  | 625418     | 2477332      |
| F2-A      | 32068534              | 25977421  | 2093945    | 3862064      |
| F2-B      | 61614816              | 50626864  | 2029247    | 8734583      |
| F2-C      | 153384582             | 113897228 | 23732328   | 15236983     |
| F2-D      | 74235640              | 63734278  | 1591789    | 8520717      |
| F2-E      | 49835074              | 35608591  | 6532984    | 7438692      |
| F2-F      | 87648612              | 61543354  | 15318188   | 10364256     |

**Table S6: Mapping of mRNA libraries.** mRNA libraries were uniquely mapped using Biokanga v 2.95.0.
